# Supplementary material
Source: publisher site journal article supplement (https://www.dovepress.com/article/268087)
Supplement: Supplementary file 1 [file get_supplementary_file.php]

# Supplemental Table 1. Prevalence Ratios for Serious Psychological Distress Associated with Sleep Duration

# as well as Sleep Disturbances, Overall and by Race/Ethnicity, National Health Interview Survey 2004-2017,

# N=316,840

|  | **Prevalence Ratios (95% Confidence Intervals)** | | | |
| --- | --- | --- | --- | --- |
|  | **Overall** | **NH-White** | **NH-Black** | **Hispanic/Latinx** |
| **Short Sleep Duration**  **(<7 vs. 7-9 hours)** | 2.80  (2.62-3.01) | 2.66  (2.44-2.89) | 3.50  (2.97-4.13) | 2.95  (2.42-3.61) |
| **Long Sleep Duration**  **(>9 vs. 7-9 hours)** | 3.15  (2.82-3.53) | 3.36  (2.96-3.81) | 2.27  (1.70-3.03) | 2.71  (1.82-4.02) |
| **Trouble Falling Asleep** | 5.43  (4.86-6.06) | 4.88  (4.29-5.55) | 6.86  (5.24-8.96) | 9.10  (6.46-12.81) |
| **Trouble Staying Asleep** | 4.55  (4.08-5.07) | 4.21  (3.72-4.75) | 6.50  (4.97-8.51) | 4.89  (3.45-6.92) |
| **Woke Feeling Unrested** | 5.78  (5.12-6.53) | 5.63  (4.88-6.48) | 6.68  (5.11-8.73) | 5.57  (3.72-8.33) |
| **Took Sleep Medication** | 3.81  (3.48-4.18) | 3.66  (3.28-4.07) | 4.15  (3.25-5.29) | 4.74  (3.49-6.44) |

Abbreviations: NH (non-Hispanic)

Models were adjusted for age, sex/gender, educational attainment, annual household income, occupational class,

employment status, region of residence, heavy alcohol consumption and “ideal” cardiovascular health. “Ideal”

cardiovascular health includes never smoking/quit >12 months prior to interview, BMI 18.5 - <25 kg/m2, high levels of physical activity, and no prior diagnosis of dyslipidemia, hypertension, or diabetes/prediabetes.

# Supplemental Table 2. Prevalence Ratios for Serious Psychological Distress among NH-Blacks and Hispanic/Latinxs Reporting Short (<7 hours), Recommended (7-9 hours), and Long (>9 hours) Sleep Duration Compared to NH-Whites

# with Recommended Sleep, National Health Interview Survey 2004-2017, N=316,840

|  | **NH-Blacks Compared to**  **NH-Whites with Recommended Sleep** | | | **Hispanic/Latinx Compared to**  **NH-Whites with Recommended Sleep** | | |
| --- | --- | --- | --- | --- | --- | --- |
|  | **Short Sleep Duration** | **Recommended Sleep Duration** | **Long Sleep Duration** | **Short Sleep Duration** | **Recommended Sleep Duration** | **Long Sleep Duration** |
| **Prevalence Ratios**  **(95% Confidence Interval)** | 2.24  (2.02-2.50) | 0.62  (0.53-0.73) | 1.38  (1.04-1.84) | 2.61  (2.27-3.01) | 0.84  (0.70-1.01) | 2.21  (1.51-3.22) |

Abbreviations: NH (non-Hispanic)

Models were adjusted for age, sex/gender, educational attainment, annual household income, occupational class, employment status, region of residence, heavy alcohol consumption, and “ideal” cardiovascular health. “Ideal” cardiovascular health includes never smoking/quit >12 months prior to interview, BMI 18.5 - <25 kg/m2, high levels of physical activity, and no prior diagnosis of dyslipidemia, hypertension, or diabetes/prediabetes.

# Supplemental Table 3. Prevalence Ratios for Serious Psychological Distress Associated with Sleep Duration as well as Sleep Disturbances, Overall and by Race/Ethnicity for participants with Excellent/Very Good/Good Self-rated Health and Fair/Poor Self-rated Health, National Health Interview Survey 2004-2017, N=316,840

|  | **Overall** | | **NH-White** | | **NH-Black** | | **Hispanic/Latinx** | |
| --- | --- | --- | --- | --- | --- | --- | --- | --- |
|  | **Self-Rated Health** | | | | | | | |
|  | **Excellent/Very Good/Good Health**  **(n=270,975)** | **Fair/Poor**  **Health**  **(n=45,747)** | **Excellent/Very Good/Good Health**  **(n=208,392)** | **Fair/Poor**  **Health**  **(n=30,393)** | **Excellent/Very Good/Good Health**  **(n=39,575)** | **Fair/Poor**  **Health**  **(n=11,224)** | **Excellent/Very Good/Good Health**  **(n=23,008)** | **Fair/Poor**  **Health**  **(n=4,130)** |
| **Short Sleep Duration**  **(<7 vs. 7-9 hours)** | 2.77  (2.52-3.05) | 1.98  (1.80-2.17) | 2.70  (2.40-3.03) | 1.79  (1.59-2.00) | 3.12  (2.43-3.99) | 2.89  (2.39-3.51) | 2.67  (2.02-3.54) | 2.61  (2.00-3.41) |
| **Long Sleep Duration**  **(>9 vs. 7-9 hours)** | 3.08  (2.57-3.69) | 2.02  (1.77-2.31) | 3.18  (2.59-3.90) | 2.05  (1.77-2.39) | 2.63  (1.64-4.22) | 1.81  (1.30-2.52) | 2.86  (1.56-5.25) | 2.28  (1.45-3.58) |
| **Trouble Falling Asleep** | 6.26  (5.42-7.24) | 2.68  (2.31-3.11) | 5.77  (4.87-6.83) | 2.28  (1.92-2.71) | 6.26  (4.28-9.15) | 4.94  (3.37-7.24) | 11.13  (7.14-17.33) | 4.34  (2.65-7.10) |
| **Trouble Staying Asleep** | 4.75  (4.10-5.51) | 2.63  (2.24-3.08) | 4.47  (3.79-5.27) | 2.23  (1.87-2.67) | 6.62  (4.54-9.67) | 4.64  (3.29-6.55) | 4.86  (3.14-7.53) | 3.71  (2.12-6.50) |
| **Woke Feeling Unrested** | 5.86  (4.94-6.94) | 3.49  (2.93-4.15) | 5.84  (4.78-7.14) | 3.07  (2.52-3.73) | 6.05  (4.02-9.09) | 5.72  (3.95-8.28) | 5.5  (3.25-9.31) | 4.37  (2.38-8.03) |
| **Took Sleep Medication** | 4.29  (3.72-4.95) | 2.15  (1.90-2.42) | 3.94  (3.35-4.65) | 2.08  (1.82-2.39) | 6.52  (4.54-9.36) | 2.01  (1.52-2.66) | 4.98  (3.17-7.82) | 2.76  (1.85-4.11) |

Abbreviations: NH (non-Hispanic)

Models were adjusted for age, sex/gender, educational attainment, annual household income, occupational class, employment status, and region of residence, and heavy alcohol consumption.

# Supplemental Figure 1. Flow Chart Diagram of Final Analytic Sample Derivation

NHIS, 2004-2017

(n = 1,302,916)

Analytical Sample

(n = 316,840)

Age ≥ 18 years*

(n = 338,737: 26%)

n = 964,179 £

Neither White, Black, nor Hispanic*

(n =79,367: 8.2%)

n = 884,812

Non-US Born*

(n = 160,183: 18.1%)

n = 724,629

Missing Sleep Duration Data

(n =7,819: 2.4%)

n = 320,713

Missing Sleep Disturbance Data (2013-2017)

(n = 1,064: 0.3%)

n = 319,649

Missing Kessler-6 Data

(n = 2,809: 0.9%)

Not selected as Sample Adult**, or Armed Forces Member

(n = 396,097: 54.6%)

n = 328,532

NHIS = National Health Interview Survey; NH = Non-Hispanic

£ Note-Only sample adults (age ≥18 years) were asked sleep questions

*Missing data were also excluded

** A household sampled for the NHIS may contain multiple families with multiple adults, but only 1 civilian adult is sampled per family, and only these sample adults are asked to report on their personal habitual sleep duration.
